1 **A universal model for carbon dioxide uptake by plants**

2

3 Han Wang<sup>1,2\*</sup>, I. Colin Prentice<sup>1,2,3</sup>, William K. Cornwell<sup>4</sup>, Trevor F. Keenan<sup>2</sup>, Tyler W. Davis<sup>3,5</sup>, Ian J.  
4 Wright<sup>2</sup>, Bradley J. Evans<sup>2,6</sup> and Changhui Peng<sup>1,7\*</sup>

5

6 <sup>1</sup> State Key Laboratory of Soil Erosion and Dryland Farming on the Loess Plateau, College of Forestry,  
7 Northwest A & F University, Yangling 712100, China

8 <sup>2</sup> Department of Biological Sciences, Macquarie University, North Ryde, NSW 2109, Australia

9 <sup>3</sup> AXA Chair of Biosphere and Climate Impacts, Grand Challenges in Ecosystems and the Environment  
10 and Grantham Institute – Climate Change and the Environment, Department of Life Sciences, Imperial  
11 College London, Silwood Park Campus, Buckhurst Road, Ascot SL5 7PY, UK

12 <sup>4</sup> Ecology and Evolution Research Centre, School of Biological, Earth and Environmental Sciences,  
13 The University of New South Wales, Randwick, NSW 2052, Australia

14 <sup>5</sup> Robert W. Holley Center for Agriculture and Health, United States Department of Agriculture-  
15 Agricultural Research Service, Ithaca, NY 14853, United States

16 <sup>6</sup> Faculty of Agriculture and Environment, Department of Environmental Sciences, The University of  
17 Sydney, NSW 2006, Australia

18 <sup>7</sup> Department of Biological Sciences, Institute of Environmental Sciences, University of Quebec at  
19 Montreal, C.P. 8888, Succ. Centre-Ville, Montréal H3C 3P8, Québec, Canada

20

21 \*Correspondence to:

22 H Wang: wanghan\_sci@yahoo.com, C Peng: peng.changhui@uqam.ca

23 **Abstract**

24 The rate of carbon uptake by land plants depends on the ratio of leaf-internal to ambient  
25 carbon dioxide partial pressures<sup>1</sup>, here termed  $\chi$ . This quantity is a key determinant of both primary  
26 production and transpiration and the relationship between them. But current models for  $\chi$  are empirical  
27 and incomplete, contributing to the many uncertainties afflicting model estimates and future projections  
28 of terrestrial carbon uptake<sup>2,3</sup>. Here we show that a simple evolutionary optimality hypothesis<sup>4,5</sup>  
29 generates functional relationships between  $\chi$  and growth temperature, vapour pressure deficit and  
30 elevation that are precisely and quantitatively consistent with empirical  $\chi$  values from a worldwide data  
31 set containing > 3500 stable carbon isotope measurements. A single global equation embodying these  
32 relationships then unifies the empirical light use efficiency model<sup>6</sup> with the standard model of C<sub>3</sub>  
33 photosynthesis<sup>1</sup>, and successfully predicts gross primary production as measured at flux sites. This  
34 achievement is notable because of the equation's simplicity (with just two parameters, both  
35 independently estimated) and applicability across biomes and plant functional types. Thereby it  
36 provides a theoretical underpinning, grounded in eco-evolutionary principles, for large-scale analysis of  
37 the CO<sub>2</sub> and water exchanges between atmosphere and land.

38 **Main**

39 Current Earth System Models (ESMs) disagree even on the most basic processes in the global  
40 carbon cycle, including terrestrial CO<sub>2</sub> uptake<sup>2,3</sup> – suggesting a need to revisit foundational questions in  
41 ecosystem science<sup>7,8</sup>. Depending on their history and purpose, ESMs represent plant CO<sub>2</sub> uptake either  
42 with the standard model of Farquhar et al.<sup>1</sup>, which accurately describes the instantaneous  
43 environmental and physiological controls of photosynthesis, or with the empirical light use efficiency  
44 (LUE) model, which can predict primary production over weeks to months<sup>6,9</sup>. These approaches have  
45 served for the past three decades as parallel frameworks for relating primary production to  
46 environmental drivers, but the connection between them remains tenuous<sup>9</sup>. Moreover, large-scale  
47 implementations of both require independent information to be provided, such as photosynthetic  
48 capacities ( $V_{max}$  and  $J_{max}$ ) and the ratio of leaf-internal ( $c_i$ ) to ambient ( $c_a$ ) CO<sub>2</sub> concentrations (here  
49 termed  $\chi$ ) in the Farquhar model, and response functions for various environmental factors in the LUE  
50 model. There is no accepted general way to do this<sup>10,11</sup>, and as a result, different implementations of  
51 apparently the same model can give very different answers in different ESMs.

52 The biochemical reactions of photosynthesis are critically dependent on the value of  $\chi$ <sup>12</sup>. CO<sub>2</sub>  
53 diffuses into leaves through the stomata (microscopic pores in the leaf surface) towards the  
54 chloroplasts, where reducing power derived from solar energy is used to assimilate CO<sub>2</sub> into organic  
55 forms through the Calvin cycle.  $\chi$  is tightly regulated by the responses of stomatal aperture to  
56 environment.  $\chi$  determines the availability of CO<sub>2</sub> for assimilation, and thus constrains both the  
57 carboxylation- and electron transport-limited photosynthetic rates. However, current models that  
58 explicitly predict  $\chi$  represent only its response to moisture, and even this is represented by several  
59 approximate and non-equivalent formulations (for more information on the theoretical background see  
60 Supplementary Methods S1)<sup>13</sup>. A firm basis for the prediction of  $\chi$  is thus an essential step towards a  
61 first-principles representation of terrestrial plant carbon uptake. Here we derive a theory for the

62 dependencies of  $\chi$  on growing-season air temperature ( $T_g$ ), vapour pressure deficit VPD ( $D_g$ ), and  
63 elevation ( $z$ ) based on the least-cost hypothesis<sup>4,5</sup>, which states that plants minimize the combined costs  
64 of maintaining the capacities for carboxylation (maintaining the activity of Rubisco, the primary  
65 carboxylating enzyme, and other photosynthetic proteins) and transpiration (maintaining living tissues  
66 to support water transport) required to achieve a given assimilation rate. The theory is tested against  
67 effective growing-season values of  $\chi$  derived from a global compilation of stable carbon isotope ( $\delta^{13}\text{C}$ )  
68 measurements on leaves of  $\text{C}_3$  plants (Fig. S1). The additional hypothesis of co-limitation between  
69 carboxylation- and electron transport-limited photosynthetic rates is then used to provide a universal  
70 model of gross primary production (GPP), which unifies the Farquhar and LUE models.

71         Logit transformation of the predicted optimal value of  $\chi$  (termed  $\chi_o$ ) yields remarkably simple  
72 theoretical partial relationships with each of the three environmental predictor variables  
73 (Supplementary Methods S2). The predicted effects of each variable are shown to be quantitatively  
74 consistent with those inferred from the data, within their uncertainties (Fig. 1, Table 1). Theory and  
75 data agree that logit ( $\chi$ ) rises by  $\sim 0.0545$  per degree due to both increased assimilation costs (the  
76 affinity of Rubisco for  $\text{CO}_2$  versus  $\text{O}_2$  declines at higher temperatures) and reduced water transport  
77 costs (the viscosity of water also declines); falls by 0.5 per unit increase of  $\ln D_g$  due to the increase in  
78 transpiration costs imposed by increasing  $D$ ; and falls by  $\sim 0.0815$  per km elevation due to reduced  $\text{O}_2$   
79 pressure (increasing the affinity of Rubisco for  $\text{CO}_2$ ) and increased transpiration costs (because the  
80 saturated vapour pressure of water remains constant while the actual vapour pressure, *ceteris paribus*,  
81 declines). Thus,  $\chi$  increases with temperature by  $\sim 0.01 \text{ K}^{-1}$ , decreases with VPD by  $\sim 0.1 \text{ kPa}^{-1}$ , and  
82 decreases with elevation by  $\sim 0.01 \text{ km}^{-1}$ . By imposing the theoretical values for the three  
83 environmental effects on  $\chi$ , we estimate an intercept of 1.189, close to the fitted value of 1.168. The  
84 fully linearized theoretical model is then:

$$85 \quad \text{logit}(\chi_o) = 0.0545 (T_g - 25) - 0.5 \ln D_g - 0.0815 z + 1.189 \quad (1)$$

86 which is statistically indistinguishable from the fitted model for  $\chi$  (Table 1).

87         Equation (1) yields  $\chi_o = 0.77$  under standard conditions ( $T_g = 25 \text{ }^\circ\text{C}$ ,  $D_g = 1 \text{ kPa}$ ,  $z = 0 \text{ km}$ ).  
88 The predicted elevation effect increases with relative humidity (RH), becoming arbitrarily large as RH  
89 approaches 100% (Supplementary Methods S2). As predicted, the fitted (negative) slope of logit ( $\chi$ )  
90 with elevation becomes larger with RH, most steeply at high RH (Fig. 1). Using an independent dataset  
91 of instantaneous  $\text{CO}_2$  and water exchange measurements<sup>14</sup>, we also show – consistent with equation (1)  
92 – that the single parameter determining the sensitivity of  $\chi_o$  to VPD is influenced by temperature, but  
93 not by VPD (Table S1).

94          $\chi_o$  values from equation (1) are consistent with observed  $\chi$  across biomes ( $r = 0.51$ ) (Fig. 2).  
95 Highest values are in hot, wet, low-elevation sites (tropical forests), lowest in cold and/or dry and/or  
96 high-elevation sites (deserts, polar and alpine vegetation).  $\chi_o$  ranges globally from 0.4 to almost 1.0  
97 (Fig. S2). The reduction from the equator towards mid-latitudes is due to aridity while that in high  
98 latitudes is due to declining temperatures (Fig. S3). The elevation effect on  $\chi$  is long-known, but has  
99 not been satisfactorily explained<sup>15,16</sup>. By predicting it in the same framework that accounts for climate

100 effects, we have resolved a long-standing conundrum, showing that the unit cost of photosynthesis is  
101 reduced while that of transpiration is increased with elevation, leading to reduced  $\chi_o$ .

102 Some published analyses focused on leaf  $\delta^{13}\text{C}$  as a palaeoclimate indicator<sup>15,17,18</sup>. Unlike the  
103 well-documented effect of aridity on  $\delta^{13}\text{C}$ , these analyses detected no temperature effect, even though  
104 it is predicted both by the earlier Cowan-Farquhar criterion<sup>19</sup> and by the least-cost hypothesis<sup>4</sup> and has  
105 been shown both in short-term experiments<sup>14,20</sup> and in field data<sup>4</sup>. Mean annual precipitation (MAP) has  
106 previously been used to represent plant water availability; the lack of an observed temperature effect  
107 might then be an artefact, because MAP tends to increase with temperature. We showed a significant  
108 (but much weakened) effect of temperature when MAP was substituted for VPD (Table S2) based on  
109 our much larger data set. However the controlling variable is VPD, not MAP.

110 No significant difference was found between woody and non-woody plants (Fig. S4). The  
111 most parsimonious interpretation for the statistical significance of plant functional type (PFT)  
112 differences in  $\chi$  detected here and elsewhere is as an indirect effect caused by different PFTs' climatic  
113 preferences<sup>14</sup>. This interpretation is strongly supported by Fig. S4, which shows that differences in  $^{13}\text{C}$   
114 discrimination among PFTs are predicted correctly by the universal model. We did however show a  
115 slightly lower  $\chi$  for evergreen needleleaf trees than the other PFTs (Fig. S4). This is consistent with  
116 higher intrinsic water use efficiency in conifer forests than broadleaf forests, and could be attributed to  
117 the lower permeability of gymnosperm wood (the consequence of narrower conducting elements)<sup>21</sup>.  
118 According to our analysis, the estimated water cost is 20% higher in gymnosperms, even though the  
119 resulting difference in  $\chi$  from this component is slight (3%: Supplementary Methods S2). The slightly  
120 overestimated  $\chi$  for evergreen needleleaf trees by the universal model, and the spread of observed  $\chi$   
121 values around the central tendency, suggest that distinguishing hydraulic influences on the controls of  
122 unit transpiration costs, in particular, might further improve predictability.

123 We detected a significant negative response of  $\chi$  to soil pH, explaining an additional 5% of  
124 variance. This finding is consistent with a soil-calcium restoration experiment that enhanced annual  
125 evapotranspiration by 20%<sup>22</sup>, and other findings of high  $\chi$  on acid substrates<sup>23</sup>. The framework could be  
126 extended to consider N uptake costs, which may be higher (favouring investment in water transport) on  
127 less fertile soils.

128 The co-limitation hypothesis, stating that the two photosynthetic processes of carboxylation  
129 and transport are coupled such that photosynthetic rates limited by those two processes are equal under  
130 typical daytime conditions, provides the necessary next step towards a universal model of GPP<sup>24,25</sup>. The  
131 hypothesis implies adjustment of  $V_{cmax}$  in time and space to match environmental conditions<sup>25</sup>.  
132 Extensive field measurements also point to an optimal maximum rate of electron transport,  $J_{max}$  that  
133 maximizes the photosynthetic benefits minus the costs of maintaining the electron-transport chain<sup>26</sup>  
134 (Supplementary Methods S4). We can thereby eliminate both  $V_{cmax}$  and  $J_{max}$  as independent predictors,  
135 to derive a first-principles model:

$$136 \quad \text{GPP} = \varphi_0 I_{abs} m \sqrt{[1 - (c^*/m)^{2/3}]} \quad (2)$$

137 where

$$138 \quad m = (c_a - \Gamma^*) / \{c_a + 2\Gamma^* + 3\Gamma^* \sqrt{[1.6 \eta^* D \beta^1 (K + \Gamma^*)^{-1}]}\} \quad (3)$$

139        Here  $\phi_0$  is the intrinsic quantum yield of photosynthesis ( $1.02 \text{ g C mol}^{-1}$ )<sup>27</sup>,  $I_{abs}$  is the absorbed  
140 photosynthetic photon flux density (PPFD,  $\text{mol m}^{-2} \text{ s}^{-1}$ ),  $\Gamma^*$  is the photorespiratory compensation point  
141 (Pa),  $\eta^*$  is the viscosity of water relative to its value at 25°C,  $\beta$  represents the ratio of carboxylation and  
142 transpiration costs at 25°C ( $\beta \approx 240$ , estimated from the constant in equation 1), and  $c^*$  is the unit  
143 carbon cost for the maintenance of electron transport capacity,  $\approx 0.41$  (estimated from observed  
144  $J_{max}:V_{cmax}$  ratios) (Fig. S5). LUE is the product of  $\phi_0$ ,  $m$  and the square-root term in equation (2); thus,  
145 GPP is proportional to  $I_{abs}$ , which can be calculated from incident PPFD and remotely sensed green  
146 vegetation cover. Predicted monthly GPP compared well with monthly GPP derived from CO<sub>2</sub> flux  
147 measurements (Fig. 3). Predicted global total annual GPP is 120 Pg C, within the accepted range<sup>28</sup>.

148        Additional testable predictions arise, for example on the controls of net primary production  
149 (NPP). Our results intriguingly parallel findings from metabolic scaling theory, whereby monthly NPP  
150 was predicted and found to be proportional to growing-season length and biomass but to show a  
151 weakly negative response to temperature<sup>29</sup>. Many potential complications, such as the environmental  
152 dependencies of mesophyll conductance<sup>20</sup>, the influence of soil fertility factors on nutrient acquisition  
153 costs, and the differences among photosynthetic pathways, have been neglected so far; yet this  
154 simplistic model's predictive skill suggests a promising route to an improved predictive understanding  
155 of terrestrial carbon and water cycling.

## 156 References

- 157 1 Farquhar, G. D., von Caemmerer, S. & Berry, J. A. A biochemical model of photosynthetic  
158 CO<sub>2</sub> assimilation in leaves of C<sub>3</sub> species. *Planta* **149**, 78-90 (1980).
- 159 2 Ciais, P. *et al.* Carbon and other biogeochemical cycles. In: *Climate Change 2013: the*  
160 *Physical Science Basis. Contribution of Working Group I to the Fifth Assessment Report of*  
161 *the Intergovernmental Panel on Climate Change.* 465-570 (Cambridge University Press,  
162 2014).
- 163 3 Friedlingstein, P. *et al.* Uncertainties in CMIP5 climate projections due to carbon cycle  
164 feedbacks. *Journal of Climate* **27**, 511-526 (2014).
- 165 4 Prentice, I. C., Dong, N., Gleason, S. M., Maire, V. & Wright, I. J. Balancing the costs of  
166 carbon gain and water transport: testing a new theoretical framework for plant functional  
167 ecology. *Ecology letters* **17**, 82-91 (2014).
- 168 5 Wright, I. J., Reich, P. B. & Westoby, M. Least-cost input mixtures of water and nitrogen for  
169 photosynthesis. *The American Naturalist* **161**, 98-111 (2003).
- 170 6 Monteith, J. L. Solar radiation and productivity in tropical ecosystems. *Journal of Applied*  
171 *Ecology* **9**, 747-766 (1972).
- 172 7 Prentice, I. C., Liang, X., Medlyn, B. E. & Wang, Y. P. Reliable, robust and realistic: the three  
173 R's of next-generation land-surface modelling. *Atmospheric Chemistry and Physics* **15**, 5987-  
174 6005 (2015).
- 175 8 Wang, H., Prentice, I. C. & Davis, T. W. Biophysical constraints on gross primary production  
176 by the terrestrial biosphere. *Biogeosciences* **11**, 5987-6001 (2014).

- 177 9 Medlyn, B. E. Physiological basis of the light use efficiency model. *Tree Physiology* **18**, 167-  
178 176 (1998).
- 179 10 Ali, A. *et al.* A global scale mechanistic model of the photosynthetic capacity. *Geoscientific*  
180 *Model Development Discussions* **8**, 6217–6266 (2015).
- 181 11 Cai, W. *et al.* Large differences in terrestrial vegetation production derived from satellite-  
182 based light use efficiency models. *Remote Sensing* **6**, 8945-8965 (2014).
- 183 12 De Kauwe, M. G. *et al.* Forest water use and water use efficiency at elevated CO<sub>2</sub>: a model-  
184 data intercomparison at two contrasting temperate forest FACE sites. *Global Change Biology*  
185 **19**, 1759-1779 (2013).
- 186 13 Medlyn, B. E. *et al.* Reconciling the optimal and empirical approaches to modelling stomatal  
187 conductance. *Global Change Biology* **17**, 2134-2144 (2011).
- 188 14 Lin, Y.-S. *et al.* Optimal stomatal behaviour around the world. *Nature Climate Change* **5**,  
189 459–464 (2015).
- 190 15 Körner, C., Farquhar, G. D. & Roksandic, Z. A global survey of carbon isotope discrimination  
191 in plants from high altitude. *Oecologia* **74**, 623-632 (1988).
- 192 16 Friend, A., Woodward, F. & Switsur, V. Field measurements of photosynthesis, stomatal  
193 conductance, leaf nitrogen and  $\delta^{13}\text{C}$  along altitudinal gradients in Scotland. *Functional*  
194 *Ecology* **3**, 117-122 (1989).
- 195 17 Diefendorf, A. F., Mueller, K. E., Wing, S. L., Koch, P. L. & Freeman, K. H. Global patterns  
196 in leaf  $^{13}\text{C}$  discrimination and implications for studies of past and future climate. *Proceedings*  
197 *of the National Academy of Sciences* **107**, 5738-5743 (2010).
- 198 18 Kohn, M. J. Carbon isotope compositions of terrestrial C<sub>3</sub> plants as indicators of (paleo)  
199 ecology and (paleo) climate. *Proceedings of the National Academy of Sciences* **107**, 19691-  
200 19695 (2010).
- 201 19 Cowan, I. R. & Farquhar, G. D. Stomatal function in relation to leaf metabolism and  
202 environment. *Symposia of the Society for Experimental Biology* **31**, 471-505 (1977).
- 203 20 Caemmerer, S. & Evans, J. R. Temperature responses of mesophyll conductance differ greatly  
204 between species. *Plant, Cell & Environment* **38**, 629-637 (2015).
- 205 21 Frank, D. C. *et al.* Water-use efficiency and transpiration across European forests during the  
206 Anthropocene. *Nature Climate Change* **5**, 579-583 (2015).
- 207 22 Green, M. B. *et al.* Decreased water flowing from a forest amended with calcium silicate.  
208 *Proceedings of the National Academy of Sciences* **110**, 5999-6003 (2013).
- 209 23 Maire, V. *et al.* Global effects of soil and climate on leaf photosynthetic traits and rates.  
210 *Global Ecology and Biogeography* **24**, 706-717 (2015).
- 211 24 Maire, V. *et al.* The coordination of leaf photosynthesis links C and N fluxes in C<sub>3</sub> plant  
212 species. *PloS One* **7**, e38345 (2012).
- 213 25 Haxeltine, A. & Prentice, I. C. A general model for the light-use efficiency of primary  
214 production. *Functional Ecology* **10**, 551-561 (1996).
- 215 26 Kattge, J. & Knorr, W. Temperature acclimation in a biochemical model of photosynthesis: a  
216 reanalysis of data from 36 species. *Plant, Cell & Environment* **30**, 1176-1190 (2007).

- 217 27 Long, S. P., Postl, W. F. & Bolhar-Nordenkamp, H. R. Quantum yields for uptake of carbon  
218 dioxide in C<sub>3</sub> vascular plants of contrasting habitats and taxonomic groupings. *Planta* **189**,  
219 226-234 (1993).
- 220 28 Beer, C. *et al.* Terrestrial gross carbon dioxide uptake: global distribution and covariation with  
221 climate. *Science* **329**, 834-838 (2010).
- 222 29 Michaletz, S. T., Cheng, D., Kerkhoff, A. J. & Enquist, B. J. Convergence of terrestrial plant  
223 production across global climate gradients. *Nature* **512**, 39-43 (2014).
- 224 30 Kaplan, J. O. Geophysical applications of vegetation modeling. (Doctoral Thesis, Lund  
225 University, 2001).

## 226 **Acknowledgements**

227 Research supported by an Australian Research Council Discovery grant ('Next-generation vegetation  
228 model based on functional traits') to ICP and IJW, a National Basic Research Programme of China  
229 (2013CB956602) grant to HW and CP, an Australian National Data Service grant ('Ecosystem  
230 production in space and time') to ICP, and Terrestrial Ecosystem Research Council (TERN) grants  
231 ('Ecosystem Modelling and Scaling Infrastructure') to ICP and BJE. TERN and ANDS are supported  
232 by the Australian Government National Collaborative Infrastructure Strategy (NCRIS). TFK  
233 acknowledges support from a Macquarie University Research Fellowship. We thank Yan-Shih Lin,  
234 Vincent Maire, Belinda Medlyn and Beni Stocker for discussions. The paper is a contribution to the  
235 AXA Chair Programme on Biosphere and Climate Impacts and Imperial College's initiative on Grand  
236 Challenges in Ecosystems and the Environment. In addition to authors of this paper, data were  
237 provided by Margaret Barbour, Lucas Cernusak, Todd Dawson, David Ellsworth, Graham Farquhar,  
238 Howard Griffiths, Claudia Keitel, Alexander Knohl, Peter Reich, Dave Williams, Radika Bhaskar,  
239 Hans Cornelissen, Anna Richards, Susanne Schmidt, Fernando Valladares, Christian Körner, Ernst-  
240 Detlef Schulze, Nina Buchmann and Lou Santiago. We used 'free and fair use' eddy-covariance data  
241 acquired by the FLUXNET community and, in particular, by the following networks: AmeriFlux (US  
242 Department of Energy, Biological and Environmental Research, Terrestrial Carbon Program (DE-  
243 FG02-04ER63917 and DE-FG02-04ER63911)), AsiaFlux, CarboEuropeIP, Fluxnet-Canada (supported  
244 by CFCAS, NSERC, BIOCAP, Environment Canada, and NRCan), OzFlux and TCOS-Siberia. We  
245 acknowledge the financial support to the eddy-covariance data harmonization provided by  
246 CarboEuropeIP, FAO- GTOS-TCO, iLEAPS, Max Planck Institute for Biogeochemistry, National  
247 Science Foundation, University of Tuscia, Université Laval and Environment Canada and US  
248 Department of Energy and the database development and technical support from Berkeley Water  
249 Center, Lawrence Berkeley National Laboratory, Microsoft Research eScience, Oak Ridge National  
250 Laboratory, University of California–Berkeley, University of Virginia.

251

252 **Table 1 | Regression summaries.** Logit-transformed values of the ratio of leaf-internal to ambient CO<sub>2</sub>  
253 partial pressure ( $\chi$ ), derived from  $\delta^{13}\text{C}$  measurements, were regressed against the difference between  
254 growing-season mean temperature  $T_g$  and 25°C ( $\Delta T_g$ , °C), the natural logarithm of growing-season  
255 mean VPD ( $\ln D_g$ , kPa), and elevation ( $z$ , km). Theoretical values are partial derivatives with respect to  
256 each predictor, evaluated for standard conditions ( $T_g = 25$  °C,  $D_g = 1$  kPa,  $z = 0$  km).

| Predictor    | Fitted coefficient | Confidence intervals |         | Theoretical value | Model R <sup>2</sup> |
|--------------|--------------------|----------------------|---------|-------------------|----------------------|
|              |                    | 2.5%                 | 97.5%   |                   |                      |
| $\Delta T_g$ | 0.0515             | 0.0456               | 0.0575  | <b>0.0545</b>     | 0.391                |
| $\ln D_g$    | -0.5478            | -0.6111              | -0.4846 | <b>-0.5</b>       |                      |
| $z$          | -0.1065            | -0.1315              | -0.0815 | <b>-0.0815</b>    |                      |
| intercept    | 1.1680             | 1.0464               | 1.2896  | <b>1.189</b>      |                      |

257

258



259 **Figure 1 | Partial residual plots from the regression of logit-transformed  $\chi$  against environmental**  
260 **predictors.**  $\chi$ , the ratio of leaf-internal to ambient CO<sub>2</sub> partial pressures.  $\Delta T_g$ , = growing-season mean  
261 temperature  $T_g - 25^\circ\text{C}$ .  $\ln D_g$ , natural logarithm of growing-season mean vapour pressure deficit. Inset  
262 shows elevation responses for relative humidity (RH, %) classes, compared to predicted responses  
263 (black dots) evaluated at the centre of each class.  
264

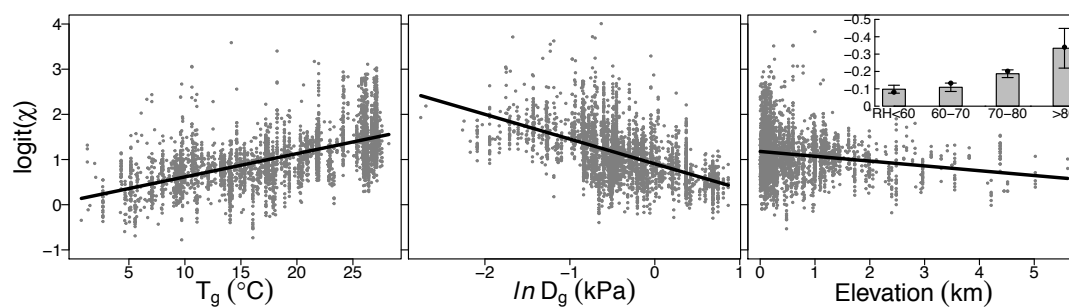

265  
266

267 **Figure 2 | Site-mean leaf-internal to ambient CO<sub>2</sub> partial pressures ( $\chi$ ).** Predictions from the  
268 theoretical model driven by three environmental variables (Table 1); observations from the global  $\delta^{13}\text{C}$   
269 dataset. Mean and standard deviation are shown for each biome. Biome type for each site were  
270 assigned based on mega-biome classification from BIOME4<sup>30</sup> for consistency of definitions and  
271 wetland and alpine types from literatures records. The regression line through the origin is imposed as  
272 the black solid line; the dashed line is the 1:1 line.

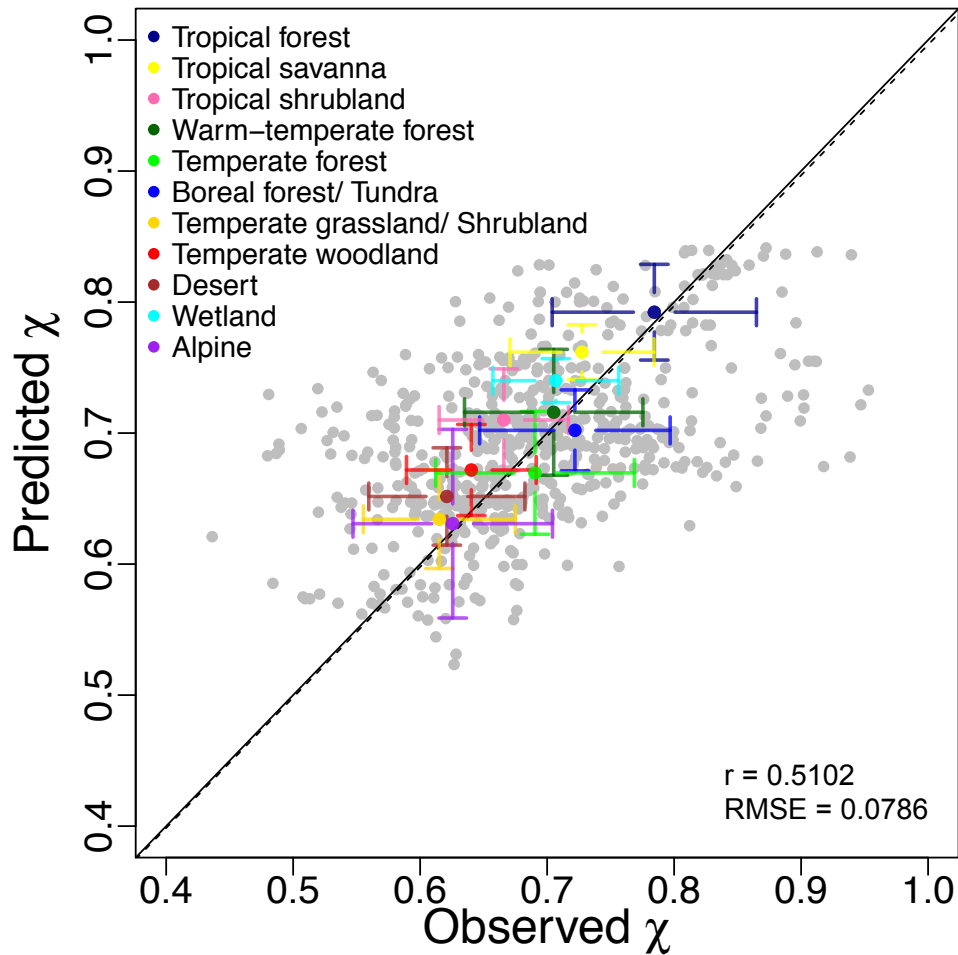

273

274 **Figure 3 | Monthly gross primary production (GPP).** Predictions from equations (2) and (3);  
275 observations based on CO<sub>2</sub> flux data in the FLUXNET archive. The regression line through the origin  
276 is imposed as the black solid line; the dashed line is the 1:1 line.

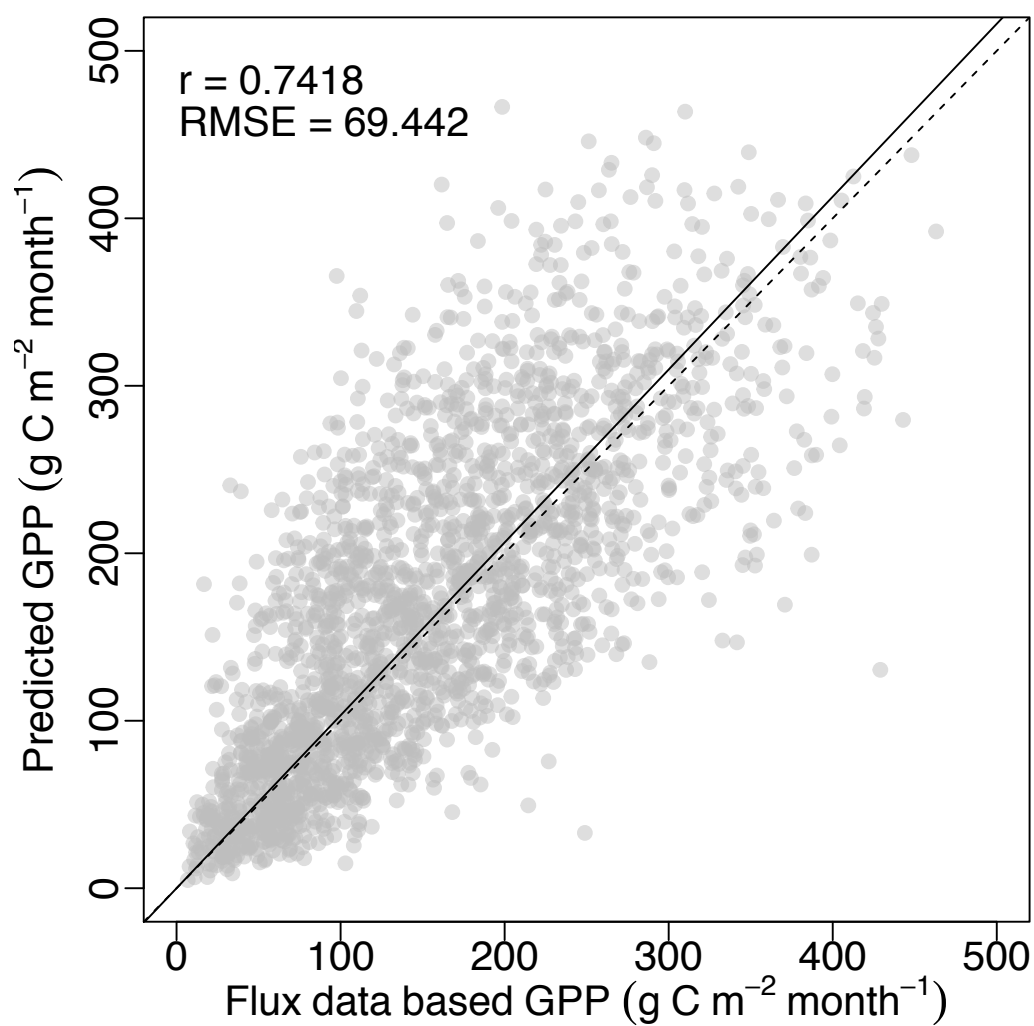

277  
278

## 279 **Methods**

### 280 **Theory for the environmental controls on $\chi$**

281 According to the least-cost hypothesis<sup>4</sup>, optimal  $\chi$  minimizes the combined costs of maintaining the  
282 capacities for carboxylation and transpiration:

$$283 \quad \chi = \zeta / (\zeta + \sqrt{D}), \text{ where } \zeta = \sqrt{(bK/1.6a)}. \quad (4)$$

284 The ratio of xylem repiration to transpiration capacity ( $a$ ) depends *inter alia* on the viscosity of water;  
285 the ratio of mitochondrial respiration to carboxylation capacity ( $b$ ) is generally taken as constant<sup>1</sup>.  $D$  is  
286 the vapour pressure deficit (VPD);  $K$  is the effective Michaelis-Menten coefficient of Rubisco.

287 Logit transformation of (4) yields:

$$288 \quad \text{logit}(\chi) = \ln[\chi/(1-\chi)] = \frac{1}{2} \ln b - \frac{1}{2} \ln a + \frac{1}{2} \ln K - \frac{1}{2} \ln D - \frac{1}{2} \ln 1.6 \quad (5)$$

289 Temperature affects  $\chi$  through  $a$  via viscosity, and  $K$  via the Michaelis-Menten coefficients for  
290 carboxylation and oxygenation. Elevation affects  $\chi$  through  $K$  and  $D$  via the partial pressures of oxygen  
291 and water vapour respectively. Separating environmental effects from invariant quantities in (5) leads  
292 to the definition of a constant term:

$$293 \quad C = \frac{1}{2} (\ln \beta + K_{ref} - \ln 1.6) \quad (6)$$

294 where  $K_{ref}$  and  $\beta$  are the values of  $K$  and the ratio  $b/a$ , respectively, under standard conditions ( $T = 298$   
295 K,  $z = 0$ ).

296 Using the Vogel equation for viscosity<sup>31</sup>, the Arrhenius equation for biochemical rate parameters and  
297 the barometric formula relating atmospheric pressure to elevation, we evaluated the partial derivatives  
298 of  $\chi$  with respect to  $T$ ,  $D$  and  $z$  at  $T = 298$  K,  $z = 0$  and  $D = 1$  kPa.  $C$  was estimated as the intercept in a  
299 Generalized Linear Model (GLM) fitted to the data with imposed regression coefficients (the calculated  
300 partial derivatives) for all three environmental effects (Supplementary Methods S2).

### 301 **Testing the theory with global $\delta^{13}\text{C}$ data**

302 Vascular-plant leaf stable carbon isotope data were compiled from published and unpublished sources  
303 by Cornwell *et al.* (submitted). The data can be downloaded from Dryad (Data link  
304 <http://datadryad.org/review?doi=doi:10.5061/dryad.3jh61>). Inferred carbon isotope discrimination ( $\Delta$ )  
305 values for 3549 leaf samples of  $\text{C}_3$  plants<sup>32</sup> (Supplementary Methods S3) were converted to estimates  
306 of  $\chi$  by a standard method. The Climatic Research Unit CL2.0 10-minute gridded monthly  
307 climatology<sup>33</sup> of mean, maximum and minimum temperatures and relative humidity provided mean  
308 temperature ( $T_g$ , °C) and vapour pressure deficit ( $D_g$ , kPa) values for the period with daily mean  
309 temperatures  $> 0^\circ\text{C}$ . Logit ( $\chi$ ) values were entered in a GLM with  $\Delta T_g = T_g - 25^\circ\text{C}$ ,  $\ln D_g$ , and site-  
310 specific elevation ( $z$ , km) as predictors. Standard errors estimated by the GLM were combined

311 quadratically with standard errors for the uncertainty of the Rubisco discrimination parameter  $b'$ , the  
 312 latter obtained by generating  $10^4$  normally distributed values of  $b'$  (mean = 27, standard deviation =  
 313 0.27) and repeating the estimation of  $\chi$  and the GLM fitting  $10^4$  times with different  $b'$  values.

### 314 Light-use efficiency model

315 The model proposed by Wang et al.<sup>8</sup> assumed that the electron-transport and Rubisco-limited rates of  
 316 photosynthesis ( $A_J$ ,  $A_C$ ) are co-limiting under typical daytime conditions<sup>24,25,34</sup>, allowing GPP to be  
 317 predicted from  $A_J$ . LUE is the product of  $\varphi_0$  and the CO<sub>2</sub> limitation term (denoted here by  $m$ ) in the  
 318 model of ref. 8. Incorporating the exact equation for  $\chi_o$  (equation 8 in ref. 4) yields:

$$319 \quad A_J = \varphi_0 I_{abs} m, \quad m = \frac{c_a - \Gamma^*}{c_a + 2\Gamma^* + 3\Gamma^* \sqrt{\frac{1.6D\eta^*}{\beta(K + \Gamma^*)}}} \quad (7)$$

320 However, (7) implies that the light response of  $A_J$  is linear up to the co-limitation point, i.e. the  
 321 maximum electron-transport rate ( $J_{max}$ ) is arbitrarily large. In reality  $J_{max}$  limitation can be  
 322 significant, especially at high temperatures. We therefore modify (7) to consider a non-rectangular  
 323 hyperbola relationship between  $A_J$  and  $I_{abs}$ <sup>35,36</sup>:

$$324 \quad A_J = \varphi_0 I_{abs} m \frac{1}{\sqrt{1 + \left(\frac{4\varphi_0 I_{abs}}{J_{max}}\right)^2}} \quad (8)$$

325 We further assume that there is a cost associated with  $J_{max}$  equal to the product of  $J_{max}$  and a constant  
 326 ( $c^*$ ), and that optimal  $J_{max}$  maximizes the benefit ( $A_J$ ) minus this cost. The optimal ratio  $J_{max}/V_{cmax}$  at the  
 327 growth temperature is then:

$$328 \quad \frac{J_{max}}{V_{cmax}} = \frac{4}{(c_i + K)} \sqrt[3]{\frac{(c_i - \Gamma^*)(c_i + 2\Gamma^*)^2}{c^*}} \quad (9)$$

329 where  $c_i = \chi c_a$ , and  $c^*$  can be estimated from data in ref. 26. We evaluated (9) at each grid cell in the  
 330 CRU CL1.0 climatology<sup>37</sup> and regressed the results against  $T_g$  (Fig. S5), indicating a strong relationship  
 331 consistent with observations<sup>26</sup>. The LUE model is accordingly revised to (Supplementary Methods S4):

$$332 \quad A_J = \varphi_0 I_{abs} m \sqrt{1 - \left(\frac{c^*}{m}\right)^{\frac{2}{3}}}, \quad m = \frac{c_a - \Gamma^*}{c_a + 2\Gamma^* + 3\Gamma^* \sqrt{\frac{1.6D\eta^*}{\beta(K + \Gamma^*)}}} \quad (10)$$

333

### 334 **GPP data-model comparison**

335 Equations (2)-(3) yielded modelled site-specific monthly GPP values for comparison with values  
336 independently derived from eddy-covariance measurements of CO<sub>2</sub> exchange in the Free and Fair Use  
337 subset of the FLUXNET archive, using a consistent gap-filling procedure (Supplementary Methods  
338 S5). For the modelled values, monthly LUE was estimated based on temperature and vapour pressure  
339 extracted from CRU time-series (TS 3.22) data at 0.5°C resolution<sup>38</sup> and site-observed  $c_a$ . Monthly  
340 absorbed PPFD was estimated as the product of PPFD (0.45 times the WATCH incident surface  
341 shortwave radiation<sup>39</sup>, divided by 0.22 J  $\mu\text{mol}^{-1}$ ) and the MODIS Enhanced Vegetation Index (EVI),  
342 equated to the fraction of photosynthetically active radiation absorbed by foliage<sup>40</sup>. To match the  
343 WATCH data resolution, EVI was upscaled to the 0.5° grid cell in which each site was located.

344

### 345 **References**

346

- 347 31 Vogel, H. Temperaturabhängigkeitsgesetz der Viskosität von Flüssigkeiten. *Physik Z* **22**, 645-  
348 646 (1921).
- 349 32 Farquhar, G. D., Ehleringer, J. R. & Hubick, K. T. Carbon isotope discrimination and  
350 photosynthesis. *Annual Review of Plant Biology* **40**, 503-537 (1989).
- 351 33 New, M., Lister, D., Hulme, M. & Makin, I. A high-resolution data set of surface climate over  
352 global land areas. *Climate Research* **21**, 1-25 (2002).
- 353 34 Chen, J.-L., Reynolds, J. F., Harley, P. C. & Tenhunen, J. D. Coordination theory of leaf  
354 nitrogen distribution in a canopy. *Oecologia* **93**, 63-69 (1993).
- 355 35 Smith, E. L. The influence of light and carbon dioxide on photosynthesis. *The Journal of*  
356 *general physiology* **20**, 807-830 (1937).
- 357 36 Harley, P. C., Thomas, R. B., Reynolds, J. F. & Strain, B. R. Modelling photosynthesis of  
358 cotton grown in elevated CO<sub>2</sub>. *Plant, Cell & Environment* **15**, 271-282 (1992).
- 359 37 New, M., Hulme, M. & Jones, P. Representing twentieth-century space-time climate  
360 variability. Part I: Development of a 1961-90 mean monthly terrestrial climatology. *Journal of*  
361 *Climate* **12**, 829-856 (1999).
- 362 38 Harris, I., Jones, P., Osborn, T. & Lister, D. Updated high-resolution grids of monthly climatic  
363 observations—the CRU TS3.10 Dataset. *International Journal of Climatology* **34**, 623-642  
364 (2014).
- 365 39 Weedon, G. P. *et al.* The WFDEI meteorological forcing data set: WATCH Forcing Data  
366 methodology applied to ERA-Interim reanalysis data. *Water Resources Research* **50**, 7505-  
367 7514 (2014).
- 368 40 Xiao, X., Zhang, Q., Hollinger, D., Aber, J. & Moore, B. I. Modeling gross primary  
369 production of an evergreen needleleaf forest using MODIS and climate data. *Ecological*  
370 *Applications* **15**, 954-969 (2005).

### 371 **Author contributions**

372 The least-cost theory was first proposed by I.J.W. and further developed by I.C.P. I.C.P. and H.W.  
373 derived the predictions. H.W. carried out all the analyses and constructed the Figures and Tables.  
374 W.K.C. originated and compiled the  $\Delta^{13}\text{C}$  data set. B.J.E., T.W.D. and I.C.P. developed and tested the  
375 flux partitioning method; T.W.D. developed the global flux database and all the GPP computations.  
376 T.F.K. contributed on quantifying the regression uncertainties. H.W. and I.C.P. wrote the first draft; all  
377 authors contributed to the final draft.  
378
